# Supplementary material for: Projection neurons are necessary for the maintenance of the mouse olfactory circuit
Source: eLife. 2024 Dec 13;13:RP90296. doi: 10.7554/eLife.90296 (PMC11643621; doi:10.7554/eLife.90296)
Supplement: Figure 1—figure supplement 2—source data 1. [file elife-90296-fig1-figsupp2-data1.xlsx]

## Sheet: F1S2A
Weights	Male	Tbx21::DTA	Tbx21 (control)		Females	Tbx21::DTA	Tbx21 (control)				Males	Tbx21::iDTR	Tbx21 (control)		Females	Tbx21::iDTR	Tbx21 (control)
	1	28.3	32		1	28	20.4				1	30	29.4		1	26	21
	2	27.8	29		2	27	20.3				2	26.2	30.7		2	21	20.2
	3	30.6	26		3	25	24				3	27.3	29.1		3	24.8	20.4
	4	31.9	27		4	26	23.2				4	26.5	26.1		4	22.7	20.3
	5	32.2	34		5	22	19.5				5	26.9	28.9		5	21.3	24
	6	26.5	27		6	23	24.2				6	25.4	29.2		6	20.1	23.2
	7	32.6	27		7	27	24.4				7	25.2	27.2		7	21.2	19.5
	8	24.7	31.5		8	26	24.7				8	25.1	27		8	20.9	24.2
	9	26.2	33.7		9	24	27.4				9	24.4	22.9		9	21.6	24.4
	10	26.1	27.3		10	19.4	21				10	25.8	30		10	21	24.7
	11	30	31.4		11	20.1	20.2				11	28.1	29.4		11	22.1	27.4
	12	23	26.6		12	27.7	30.5				12	26.8			12	20.1	24.2
	13	27	24		13	24.2	29.8								13	24.6	20.5
	14	24.7	29.8		14	25.1	27.3								14	21	23.2
	15	23.8	36.3		15	19.9	29.5								15	23.2	24.4
	16	27.1	32.2		16	23.1	31.2								16	20.7	23.7
	17	27.8	34.5		17	20	27.8								17	24.3
	18	29.7	32.3		18	26.3	27.4								18	20.7
	19	27.1	31.1		19	23.1	30.4								19	21.7
															20	24.7
	mean	27.7111	30.1421		mean	24.0474	25.4316								21	22.6
	sd	2.89399	3.39678		sd	2.77876	3.94491								22	23.4
	t-test	0.0252887			t-test	0.219217
											mean	26.475	28.1727		mean	22.2591	22.8312
											sd	1.52383	2.22715		sd	1.72037	2.22942
											t-test	0.0216771			t-test	0.188731

## Sheet: F1S2D
	Tbx21 (mm3)	Tbx21::DTA (mm3)	Tbx21::iDTR (mm3)
Glomerular	2.07288	1.11457	1.41
EPL	2.11684	0.656481	0.66
GCL	3.56529	1.63388	1.75
RMS	0.35612	0.140124	0.09
total	8.11114	3.54505	3.91
Glomerular	0.25556	0.314401	0.36
EPL	0.26098	0.185182	0.17
GCL	0.439555	0.460891	0.45
RMS	0.0439051	0.0395266	0.02
