# Supplementary material for: Projection neurons are necessary for the maintenance of the mouse olfactory circuit
Source: eLife. 2024 Dec 13;13:RP90296. doi: 10.7554/eLife.90296 (PMC11643621; doi:10.7554/eLife.90296)
Supplement: Figure 1—source data 1. [file elife-90296-fig1-data1.xlsx]

## Sheet: F1C
	# M/T cells
# animals	P120 (Tbx21 - control)	P10 (Tbx21::DTA)	P21 (Tbx21::DTA)	P120 (Tbx21::DTA)
1	35195.2	9591	1637	367
2	39985.6	8280	1038	382
3	40459.5	11246	885	631
4		9309	929	589
5			843	478
6			821	340
7			783	298
8			1334	416
9			953
mean	38546.8	9606.5	1024.78	437.625
sd	2912.23	1229.68	282.289	119.232

## Sheet: F1F
	# M/T cells innervating one or two glomeruli
Tbx21::DTA	1	2	Total	# animals
P10	95	7	102	3
P21	148	13	161	3
% M/T cells innervating one or two glomeruli
Tbx21::DTA	1	2
P10	94.364	5.636
P21	97.93	2.07
