# Supplementary material for: Projection neurons are necessary for the maintenance of the mouse olfactory circuit
Source: eLife. 2024 Dec 13;13:RP90296. doi: 10.7554/eLife.90296 (PMC11643621; doi:10.7554/eLife.90296)
Supplement: Figure 2—figure supplement 2—source data 1. [file elife-90296-fig2-figsupp2-data1.xlsx]

## Sheet: F2S2
	Apical dendrite tuft length (µm)
Cells	Tbx21 (control)	Tbx21::DTA	Tbx21::iDTR	Tbx21::iDTR (P180)	Tbx21::iDTR (1/2 DT)
1	4536	8359	24200	14067	7315
2	7245	8252	18900	11700	27300
3	3550	8791	21700	11500	19800
4	2888	22600	14300	11554	10600
5	7149	14800	7132	10100	7653
6	8083	14500	7199	3315	9697
7	5577	7915	8061	13100	16000
8	3761	30100	6833	17300	16300
9	5684	9894	11600	9185	25200
10	5412	11300	27355	28061	11800
11	5136	11000	14600	21783	3164
12	4276	5599	8767	9427	6408
13	11800	10900	4504	10500	14300
14	4810	6400	18200	19400	22000
15	5749	16200	11200	16000	7087
16	9773	27800	11200	7678	13900
17	11800	16100	4546	9889	16100
18	6168	2524	6719	6325	9016
19	9335	13900	22200	11100	13300
20	6314	8745	6304	9146	13700
21	4657	9769	22255	11500	2884
22	3450	11000	26500	10000	11500
23		17500	18700	4203	16800
24		15400	18100	9081
25				10718
26				12642
27				2034
28				2976
29				12400
30				14800
31				17600
mean	6234.23	12889.5	14211.5	11583.4	13122.8
sd	2542.39	6609.3	7324.55	5504.59	6402.71
