# Supplementary material for: Projection neurons are necessary for the maintenance of the mouse olfactory circuit
Source: eLife. 2024 Dec 13;13:RP90296. doi: 10.7554/eLife.90296 (PMC11643621; doi:10.7554/eLife.90296)
Supplement: Figure 2—source data 1. [file elife-90296-fig2-data1.xlsx]

## Sheet: F2C
	# M/T cells
	P120 Tbx21 (control)	P120 Tbx21::DTA	P120 Tbx21::iDTR	P120 Tbx21::iDTR (1/2DT)
1	35195.2	367	1265	8267
2	39985.6	382	1138	11354
3	40459.5	631	1071	9835
4		589
5		478
6		340
7		298
8		416
mean	38546.8	437.625	1158	9818.67
sd	2912.23	119.232	98.5343	1543.56

## Sheet: F2I
	# mitral cells						# animals
	1	2	3	4	5	Total
Tbx21 (control)	156	2	0			158	5
Tbx21::DTA	96	36	12	5		149	10
Tbx21::iDTR (P60)	98	64	22	2	2	188	5
Tbx21::iDTR (P180)	130	65	40	1		236	5
Tbx21::iDTR (1/2 DT)	189	88	31			308	4
	% mitral cells
	1	2	>=3
Tbx21 (control)	98.7342	1.26582	0	100
Tbx21::DTA	64.4295	24.1611	11.4094	100
Tbx21::iDTR (P60)	52.1277	34.0426	13.8298	100
Tbx21::iDTR (P180)	55.0847	27.5424	17.3729	100
Tbx21::iDTR (1/2 DT)	61.3636	28.5714	10.0649	100
