# Supplementary material for: Projection neurons are necessary for the maintenance of the mouse olfactory circuit
Source: eLife. 2024 Dec 13;13:RP90296. doi: 10.7554/eLife.90296 (PMC11643621; doi:10.7554/eLife.90296)
Supplement: Figure 3—figure supplement 3—source data 1. [file elife-90296-fig3-figsupp3-data1.xlsx]

## Sheet: F3S3C
	gene	GFP		Vm
20200723_002	kir	-	1.22319	-66.54
20200723_012	kir	-	1.18757	-58.27
20200723_013	kir	-	1.31398	-61.4
20200715_001	kir	-	1.02874	-60.07
20200715_003	kir	-	1.3017	-56.45
20200715_008	kir	-	1.1267	-51.38
20200715_010	kir	-	1.1104	-57.47
20200715_011	kir	-	1.1903	-62.04
20200723_001	kir	+	2.15956	-62.55
20200723_003	kir	+	2.17808	-54.64
20200723_004	kir	+	2.12393	-77.98
20200723_005	kir	+	2.29708	-68.29
20200723_006	kir	+	2.08502	-80.33
20200723_007	kir	+	2.31065	-72.53
20200723_008	kir	+	2.29812	-71.07
20200723_009	kir	+	2.24002	-82.7
20200723_010	kir	+	2.31624	-65.33
20200723_011	kir	+	2.1997	-72.06
20200723_014	kir	+	2.09761	-72.09
20200723_015	kir	+	2.27462	-78.18
20200723_016	kir	+	2.08064	-53.32
20200715_002	kir	+	2.1478	-76.28
20200715_004	kir	+	2.09031	-66.8
20200715_005	kir	+	2.13864	-79.22
20200715_006	kir	+	2.153	-73.52
20200715_007	kir	+	2.29747	-83.45
20200715_009	kir	+	2.00052	-76.58
20200715_012	kir	+	2.22163	-76.45
20200715_013	kir	+	2.09183	-70.61
		kir-	mean	-59.2025
			sem	1.69098
		kir +	mean	-75.3637
			sem	1.82365
		wt	mean	-51.0561
			sem	1.05382
			Naïve control	-48.34
				-46.31
				-47.3
				-50.5
				-57.68
				-49
				-46.55
				-50.427
				-55.069
				-47.301
				-52.57
				-56.327
				-53.361
				-54.05

## Sheet: F3S3D
	gene	GFP		Ri
20200723_002	kir	-	1.01368	67.68
20200723_012	kir	-	1.25387	53.5
20200723_013	kir	-	1.02945	59.03
20200715_001	kir	-	1.17082	87.4
20200715_003	kir	-	1.2829	148
20200715_008	kir	-	1.0759	180
20200715_010	kir	-	1.04844	69.17
20200715_011	kir	-	1.18819	33.32
20200723_001	kir	+	2.04699	104.8
20200723_003	kir	+	2.28372	53.6
20200723_004	kir	+	2.12984	25.76
20200723_005	kir	+	2.22923	25.41
20200723_006	kir	+	2.11072	26.73
20200723_007	kir	+	2.08687	64.71
20200723_008	kir	+	2.28764	19.01
20200723_009	kir	+	2.03374	22.85
20200723_010	kir	+	2.08264	88.63
20200723_011	kir	+	2.0928	64.79
20200723_014	kir	+	2.18306	46.96
20200723_015	kir	+	2.02841	53.4
20200723_016	kir	+	2.17166	64.92
20200715_002	kir	+	2.03948	7.52
20200715_004	kir	+	2.15382	94.4
20200715_005	kir	+	2.01033	30.61
20200715_006	kir	+	2.23803	22.8
20200715_007	kir	+	2.33181	19.79
20200715_009	kir	+	2.31061	15.41
20200715_012	kir	+	2.04758	7.41
20200715_013	kir	+	2.01571	40.6
		Kir-	mean	87.2625
			sem	19.0846
		kir +	mean	29.8175
			sem	6.41313
		wt	mean	127.322
			sem	12.468
			naïve control	53.75
				89.54
				170.9
				169.1
				71.49
				112.6
				129.1
				77.58
				230.4
				102.3
				146.4
				191.1
				102.5
				183.3
				73.7
				214.9
				81.35
				83.6
				135.5

## Sheet: F3S3E
	gene	GFP	I_inj	10	20	30	40	50	60	70	80	90	100	110	120	130	140	150	200	250	300	350	400	500	600	700	800	900	1000	1100	1200	1300	1400	1500	1600	1700	1800
20200723_002	kir	-	1.31096	0	0	0	0	0	0	0	0	0	0	0	1	2	2	3	6	15	29	35	43	54	65	75	82
20200723_012	kir	-	1.01435	0	0	0	0	0	0	0	0	0	0	9	7	11	14	19	32	40	47	54	59	69	80	89	96
20200723_013	kir	-	1.28824	0	0	0	0	0	0	0	0	4	3	5	7	10	13	14	26	33	42	47	53	63	71	79	89	99
20200715_001	kir	-	1.32181	0	0	0	2	4	7	7	9	14	13	14	17	24	19	25	34	39	46	50	54	62	78	82	89
20200715_003	kir	-	1.26315	6	1	8	11	16	21	22	17	19	24	35	34	26	31	40	43	63	64	73	76	83	97	102	109
20200715_008	kir	-	1.29184	12	20	18	22	24	25	28	30	30	33	32	33	36	37	40	49	58	63	70	74	86	95	104	109
20200715_010	kir	-	1.12092	0	0	2	1	4	8	9	12	15	17	16	18	21	21	22	27	35	37	41	79	92	104	103	100
20200715_011	kir	-	1.0527	0	0	0	0	0	0	0	0	0	0	1	3	8	10	11	22	32	37	44	49	53	60	68	70
20200723_001	kir	+	2.13228	0	0	0	0	0	3	1	20	19	24	26	29	32	34	40	49	57	63	71	81	91	102	110	116
20200723_003	kir	+	2.09302	0	0	0	0	0	0	0	0	0	0	0	0	0	0	0	7	12	14	19	22	30	41	52	61	71	82	94	108	114
20200723_004	kir	+	2.2967	0	0	0	0	0	0	0	0	0	0	0	0	0	0	0	0	0	0	0	0	0	0	0	0	0	0	15	33	52	79	96	86
20200723_005	kir	+	2.28208
20200723_006	kir	+	2.21374	0	0	0	0	0	0	0	0	0	0	0	0	0	0	0	0	0	0	0	0	0	0	0	0	0	0	0	0	0	3	17	24	27	29
20200723_007	kir	+	2.16274	0	0	0	0	0	0	0	0	0	0	0	0	0	0	0	0	0	0	0	3	24	39	54	71	84
20200723_008	kir	+	2.27707	0	0	0	0	0	0	0	0	0	0	0	0	0	0	0	0	0	0	0	0	0	0	0	0	0	0	0	11	27	43	59	75
20200723_009	kir	+	2.21834	0	0	0	0	0	0	0	0	0	0	0	0	0	0	0	0	0	0	0	0	0	0	0	0	0	0	0	0	0	0	0	0	0	0
20200723_010	kir	+	2.16315	0	0	0	0	0	0	0	0	0	0	0	0	0	0	4	19	28	33	39	46	55	64	72	80	85	91
20200723_011	kir	+	2.18986	0	0	0	0	0	0	0	0	0	0	0	0	0	0	0	0	0	0	0	22	51	74	70	21
20200723_014	kir	+	2.12024	0	0	0	0	0	0	0	0	0	0	0	0	0	0	0	0	0	0	0	0	22	46	71	94	112	125	133
20200723_015	kir	+	2.26202	0	0	0	0	0	0	0	0	0	0	0	0	0	0	0	0	0	0	0	0	16	35	50	66	79
20200723_016	kir	+	2.11156	0	0	0	0	0	0	0	0	0	0	0	0	0	0	18	27	34	40	44	50	57	65	72	78	85	91	97
20200715_002	kir	+	2.10516	0	0	0	0	0	0	0	0	0	0	0	0	0	0	0	0	0	0	0	0	0	0	6	19	26	36	49	59	67	69	79	86	93	97
20200715_004	kir	+	2.25412	0	0	6	9	11	13	15	17	19	20	23	25	28	29	33	42	48	54	61	66	75	83	91	96
20200715_005	kir	+	2.10458	0	0	0	0	0	0	0	0	0	0	0	0	0	0	0	0	0	0	0	0	6	22	36	47	43
20200715_006	kir	+	2.06664	0	0	0	0	0	0	0	0	0	0	0	0	0	0	0	0	0	0	14	26	44	58	73	89	101	107	114	97
20200715_007	kir	+	2.04994	0	0	0	0	0	0	0	0	0	0	0	0	0	0	0	0	0	0	0	0	0	0	32	70	90	99
20200715_009	kir	+	2.02946	0	0	0	0	0	0	0	0	0	0	0	0	0	0	0	0	0	0	0	0	0	4	25	46	44	39	32
20200715_012	kir	+	2.23783	0	0	0	0	0	0	0	0	0	0	0	0	0	0	0	0	0	0	0	0	0	31	49	59	66	72	79	84	91	97	100
20200715_013	kir	+	2.13039	0	0	0	0	0	0	0	0	0	0	0	0	0	0	0	0	0	7	22	37	70	81
		Kir-	mean	2.25	2.625	3.5	4.5	6	7.625	8.25	8.5	10.25	11.25	14	15	17.25	18.375	21.75	29.875	39.375	45.625	51.75	60.875	70.25	81.25	87.75	93
			sem	1.68729	2.65682	2.44949	3.02372	3.42857	3.81692	4.17353	4.13052	4.1833	4.77985	5.03052	4.87811	4.27976	4.28542	4.97237	4.97929	5.73901	4.69449	5.09401	5.15648	5.65595	6.03983	5.27509	5.0548
		Kir+	mean	0	0	0.3	0.45	0.55	0.8	0.8	1.85	1.9	2.2	2.45	2.7	3	3.15	4.75	7.2	8.95	10.55	13.5	17.65	27.05	37.25	45.4211	53.3158
			sem	0	0	0.307794	0.46169	0.564288	0.676474	0.768493	1.3111	1.34164	1.5606	1.73361	1.91235	2.1236	2.23207	2.67219	3.4381	4.08868	4.58619	5.16085	5.84295	6.90958	7.67551	7.91986	8.70116
