# Supplementary material for: Projection neurons are necessary for the maintenance of the mouse olfactory circuit
Source: eLife. 2024 Dec 13;13:RP90296. doi: 10.7554/eLife.90296 (PMC11643621; doi:10.7554/eLife.90296)
Supplement: Figure 3—figure supplement 4—source data 1. [file elife-90296-fig3-figsupp4-data1.xlsx]

## Sheet: F3S4
	Apical dendrite tuft length (µm)
Cells	Tbx21 (control)	Tbx21::iDTR	Tbx21::iDTR (closed)	Tbx21::iDTR (open)	Tbx21 (Kir2.1)	Tbx21::iDTR (Kir2.1)
1	4536	24200	13700	2254	9891	7371
2	7245	18900	9207	7812	5630	12300
3	3550	21700	6147	14700	6613	4736
4	2888	14300	6460	3810	9145	17300
5	7149	7132	13100	26600	8793	6456
6	8083	7199	10100	15000	7185	3160
7	5577	8061	2635	15400	5323	8387
8	3761	6833	11600	16800	11100	10600
9	5684	11600	11900	8108	6816	6992
10	5412	27355	5979	4263	10200	4937
11	5136	14600	7472	17800	6223	9273
12	4276	8767	11600	21900	6882	4989
13	11800	4504	14700	12400	3738	21100
14	4810	18200	9091	16500	9173	12700
15	5749	11200	7475	11300	6030	5756
16	9773	11200	6629	13500	4360	12300
17	11800	4546	4424	17600	2560	16900
18	6168	6719	8281	9234	4485	7384
19	9335	22200	5891	5892	2346	10571
20	6314	6304	7742	9113	6742
21	4657	22255	7619	8515	3212
22	3450	26500	11500	9167	4728
23		18700	10400	14700
24		18100	9353
25			7665
26			18400
27			9348
28			11500
29			9951
30			5438
mean	6234.23	14211.5	9176.9	12276.9	6417.05	9642.74
sd	2542.39	7324.55	3328.08	5968.9	2505.43	4841.86
