# Supplementary material for: Projection neurons are necessary for the maintenance of the mouse olfactory circuit
Source: eLife. 2024 Dec 13;13:RP90296. doi: 10.7554/eLife.90296 (PMC11643621; doi:10.7554/eLife.90296)
Supplement: Figure 3—source data 1. [file elife-90296-fig3-data1.xlsx]

## Sheet: F3E
	# mitral cells						# animals
	1	2	3	4	5	Total
Tbx21 (control)	155	3	0			158	5
Tbx21::iDTR (P60)	98	64	22	2	2	188	5
Tbx21::iDTR (closed)	144	64	21	2		231	7
Tbx21::iDTR (open)	129	74	19	6		228	5
Tbx21::iDTR (Kir2.1)	82	31	8			121	6
	% mitral cells
	1	2	>=3
Tbx21 (control)	98.1013	1.89873	0	100
Tbx21::iDTR (P60)	52.1277	34.0426	13.8298	100
Tbx21::iDTR (closed)	62.3377	27.7056	9.95671	100
Tbx21::iDTR (open)	56.5789	32.4561	10.9649	100
Tbx21::iDTR (Kir2.1)	67.7686	25.6198	6.61157	100
