# Supplementary material for: Projection neurons are necessary for the maintenance of the mouse olfactory circuit
Source: eLife. 2024 Dec 13;13:RP90296. doi: 10.7554/eLife.90296 (PMC11643621; doi:10.7554/eLife.90296)
Supplement: Figure 4—source data 1. [file elife-90296-fig4-data1.xlsx]

## Sheet: F4E
	# glomeruli innervated by M72 axons						# animals
Tbx21 (control)	1	2	3	4		Total Obs
P10	3	8	1			12	3
P21	10	10				20	5
P120	20	4				24	6
	# glomeruli innervated by M72 axons						# animals
Tbx21 :: DTA	1	2	3	4		Total Obs
P10	3	9				12	3
P21	7	3	1	1		12	3
P120	21	21	16	6		64	16
Tbx21 :: iDTR	1	2	3	4		Total Obs
P120	18	23	8	3		52	13
