# Supplementary material for: Projection neurons are necessary for the maintenance of the mouse olfactory circuit
Source: eLife. 2024 Dec 13;13:RP90296. doi: 10.7554/eLife.90296 (PMC11643621; doi:10.7554/eLife.90296)
Supplement: Figure 5—figure supplement 1—source data 1. [file elife-90296-fig5-figsupp1-data1.xlsx]

## Sheet: F5S1
	1st cin 5% vs Oil	2nd cin 5% vs Oil	Cin 1% vs Oil	Cin 0.5% vs Oil	Cin 0.1% vs Oil	Cin 0.05% vs Oil	Cin 0.01% vs Oil	Cin 0.005% vs Oil	Cin 0.001% vs Oil		# animals
Tbx21::iDTR	84.3878	93.7755	96.0204	97.2449	75.5102	76.1224	62.6531	58.5714	56.3265	56.3265	7
trained Tbx21::iDTR	93.0357	97.6786	94.4643	94.2857	83.75	65	61.7857	53.0357	51.0714	51.0714	4
No performed	47.87	50	50.7	50	50	52.14	56.43	53.58	53.87	53.87	3
