# Supplementary material for: Projection neurons are necessary for the maintenance of the mouse olfactory circuit
Source: eLife. 2024 Dec 13;13:RP90296. doi: 10.7554/eLife.90296 (PMC11643621; doi:10.7554/eLife.90296)
Supplement: Figure 5—source data 1. [file elife-90296-fig5-data1.xlsx]

## Sheet: F5A
	1st cin 5% vs Oil	2nd cin 5% vs Oil	Cin 1% vs Oil	Cin 0.5% vs Oil	Cin 0.1% vs Oil	Cin 0.05% vs Oil	Cin 0.01% vs Oil	Cin 0.005% vs Oil	Cin 0.001% vs Oil		# animals
Tbx21 (control)	92.5	95.65	97.5	97.74	96.67	99.46	94.35	96.25	84.46		12
Tbx21::DTA	83.41	91.87	95.66	96.43	89.56	86.26	65.88	56.21	54.45		13
Tbx21::iDTR	88.7117	95.727	95.2423	95.7653	79.6301	70.5612	62.2194	55.8036	53.699		11

## Sheet: F5B
	C vs E	80/20	60/4		C+/C-	80/20	60/40		# animals
Tbx21 (control)	99.29	97.38	85.3		94.46	94.35	89.58		12
Tbx21::DTA	95.22	95.22	66.37		69.4	62.47	55.82		13
Tbx21::iDTR	92.1173	83.4184	53.7883		81.9643	68.0485	58.2015		11

## Sheet: F5C
Tbx21				Tbx21::DTA				Tbx21::iDTR
	Plug				Plug				Fight
animals	(YES/NO)			animals	(YES/NO)			animals	(YES/NO)
1	Y			1	Y			1	Y
2	Y			2	Y			2	Y
3	N			3	N			3	N
4	Y			4	N			4	N
5	Y			5	Y			5	Y
6	Y			6	Y			6	N
7	Y			7	Y			7	Y
8	Y			8	N			8	Y
9	Y			9	Y			9	Y
10	Y			10	N			10	N
11	Y			11	Y			11	Y
				12	N
total	11	%		total	12	%		total	11	%
Y=yes	1	9.09091		Y=yes	2	16.6667		Y=yes	7	63.6364
N=no	10	90.9091		N=no	10	83.3333		N=no	4	36.3636

## Sheet: F5D
Wt resident-Wt intruder				WT resident-DTA intruder				WT resident-iDTR intruder
	Fight				Fight				Fight
animals	(YES/NO)			animals	(YES/NO)			animals	(YES/NO)
1	Y			1	Y			1	N
2	Y			2	Y			2	Y
3	Y			3	N			3	N
4	Y			4	N			4	N
5	Y			5	Y			5	Y
6	Y			6	Y			6	N
7	N			7	Y			7	N
8	Y			8	N
9	Y			9	Y
10	Y
total	10	%		total	9	%		total	7	%
Y=yes	9	90		Y=yes	3	33.3333		Y=yes	2	28.5714
N=no	1	10		N=no	6	66.6667		N=no	5	71.4286

## Sheet: F5E
# animals	Tbx21 (control)	Tbx21::DTA	Tbx21::iDTR
1	2094	12	369
2	1807	19	270
3	1798	39	307
4		45
5		32
mean	1899.67	29.4	315.333
sd	168.358	13.7222	50.0233
